# Supplementary material for: Peer education for HIV prevention among high-risk groups: a systematic review and meta-analysis
Source: Springer Nature journal article supplement (doi:10.1186/s12879-020-05003-9), 2020-05-12
Supplement: MOESM2 [file 17975932]

**Supplemental table 1 (continued) Study quality assessment**

| Study                    | Cohort | Control | Pre/post intervention | Random assignment of participants | Follow-up rate of 80% or more | Comparison groups equivalent on socio-demographics | Comparison groups equivalent on outcome measure | Sample size>100 | Final score out of 8 |
|--------------------------|--------|---------|-----------------------|-----------------------------------|-------------------------------|----------------------------------------------------|-------------------------------------------------|-----------------|----------------------|
| M.Yun Gao 2007           | 1      | 1       | 1                     | 0                                 | 1                             | 1                                                  | 1                                               | 1               | 7                    |
| Mandar M Mainkar 2011    | 0      | 0       | 1                     | 0                                 | 0                             | 0                                                  | 0                                               | 1               | 2                    |
| Marco A.Hidalgo 2015     | 1      | 1       | 1                     | 0                                 | 1                             | 1                                                  | 1                                               | 1               | 7                    |
| Margaret R.Weeks 2009    | 1      | 0       | 1                     | 0                                 | 0                             | 0                                                  | 0                                               | 1               | 3                    |
| Nai-Ying Ko 2013         | 1      | 1       | 1                     | 0                                 | 1                             | 0                                                  | 1                                               | 1               | 6                    |
| Robert E. Booth 2011     | 1      | 1       | 1                     | 0                                 | 1                             | 0                                                  | 1                                               | 1               | 6                    |
| Robert E. Booth 2016     | 1      | 1       | 1                     | 1                                 | 1                             | 1                                                  | 1                                               | 1               | 8                    |
| Robert S. Broadhead 2006 | 1      | 1       | 1                     | 0                                 | 0                             | 1                                                  | 1                                               | 1               | 6                    |
| S Thilakavathi 2011      | 0      | 0       | 1                     | 0                                 | 0                             | 0                                                  | 0                                               | 1               | 2                    |
| Scott D. Rhodes 2011     | 1      | 1       | 1                     | 1                                 | 1                             | 1                                                  | 1                                               | 1               | 8                    |
| Scott Geibel 2012        | 0      | 0       | 1                     | 0                                 | 0                             | 0                                                  | 0                                               | 1               | 2                    |
| Sean D Young 2013        | 1      | 1       | 1                     | 1                                 | 1                             | 1                                                  | 1                                               | 1               | 8                    |
| Sean D Young 2015        | 1      | 1       | 1                     | 1                                 | 1                             | 1                                                  | 1                                               | 1               | 8                    |
| Shajt Isac 2015          | 0      | 0       | 1                     | 0                                 | 0                             | 0                                                  | 0                                               | 1               | 2                    |
| Simran Shaikh 2016       | 0      | 0       | 1                     | 0                                 | 0                             | 0                                                  | 0                                               | 1               | 2                    |
| Song-Ying Shen 2011      | 1      | 1       | 1                     | 0                                 | 0                             | 1                                                  | 1                                               | 1               | 6                    |
| Stanley Luchters 2008    | 0      | 0       | 1                     | 0                                 | 0                             | 0                                                  | 0                                               | 1               | 2                    |
| Susan G.Sherman 2009     | 1      | 1       | 1                     | 1                                 | 1                             | 1                                                  | 1                                               | 1               | 8                    |
| Sylvia Adebajo 2015      | 0      | 0       | 1                     | 0                                 | 0                             | 0                                                  | 0                                               | 1               | 2                    |
| Theodore M.Hammett 2005  | 0      | 0       | 1                     | 0                                 | 0                             | 0                                                  | 0                                               | 1               | 2                    |
| Katherine P.Theall 2015  | 0      | 0       | 1                     | 0                                 | 0                             | 0                                                  | 0                                               | 1               | 2                    |

**Supplemental table 1 (continued) Study quality assessment**

| Study                       | Cohort | Control | Pre/post intervention | Random assignment of participants | Follow-up rate of 80% or more | Comparison groups equivalent on socio-demographics | Comparison groups equivalent on outcome measure | Sample size>100 | Final score out of 8 |
|-----------------------------|--------|---------|-----------------------|-----------------------------------|-------------------------------|----------------------------------------------------|-------------------------------------------------|-----------------|----------------------|
| Theodore M.Hammett 2011     | 0      | 0       | 1                     | 0                                 | 0                             | 0                                                  | 0                                               | 1               | 2                    |
| Theodore M.Hammett 2012     | 0      | 1       | 1                     | 0                                 | 0                             | 1                                                  | 1                                               | 1               | 5                    |
| Thilakavathi S.2013         | 0      | 0       | 1                     | 0                                 | 0                             | 0                                                  | 0                                               | 1               | 2                    |
| Vivian F.Go 2013            | 1      | 1       | 1                     | 1                                 | 1                             | 1                                                  | 1                                               | 1               | 8                    |
| Xiushi Yang 2011            | 1      | 1       | 1                     | 0                                 | 0                             | 1                                                  | 1                                               | 1               | 6                    |
| Yu Liu 2018                 | 1      | 1       | 1                     | 1                                 | 1                             | 1                                                  | 1                                               | 1               | 8                    |
| Yuri A.Amirkhanian 2005     | 1      | 1       | 1                     | 1                                 | 1                             | 1                                                  | 1                                               | 1               | 8                    |
| Yuwen Duan 2013             | 1      | 1       | 1                     | 0                                 | 0                             | 1                                                  | 1                                               | 1               | 6                    |
| Zhujunli 2008               | 1      | 0       | 1                     | 0                                 | 0                             | 0                                                  | 0                                               | 1               | 3                    |
| Sylvia Adebajo 2015         | 0      | 0       | 1                     | 0                                 | 0                             | 0                                                  | 0                                               | 1               | 2                    |
| Aleksandra Mihailovic 2015  | 1      | 1       | 1                     | 1                                 | 1                             | 1                                                  | 1                                               | 1               | 8                    |
| Carl Latkin 2013            | 1      | 1       | 1                     | 1                                 | 0                             | 1                                                  | 1                                               | 1               | 7                    |
| Mary E.Mackesy-Amiti 2013   | 1      | 1       | 1                     | 1                                 | 1                             | 1                                                  | 1                                               | 1               | 8                    |
| Richard S. Garfein 2007     | 1      | 1       | 0                     | 1                                 | 0                             | 1                                                  | 1                                               | 1               | 6                    |
| Carl latkin 2009            | 1      | 1       | 1                     | 1                                 | 1                             | 1                                                  | 1                                               | 1               | 8                    |
| M.A Davey-Rothwell 2011     | 1      | 1       | 0                     | 1                                 | 1                             | 1                                                  | 1                                               | 1               | 7                    |
| Theresa H Hoke 2007         | 1      | 1       | 0                     | 1                                 | 1                             | 0                                                  | 1                                               | 1               | 6                    |
| Lisa M Williamson 2001      | 0      | 0       | 1                     | 0                                 | 0                             | 0                                                  | 0                                               | 1               | 2                    |
| Prabuddhagopal Goswami 2012 | 0      | 0       | 1                     | 0                                 | 0                             | 0                                                  | 0                                               | 1               | 2                    |

**Supplemental table 2 the results of egger test**

|                                     | t       | P        |
|-------------------------------------|---------|----------|
| unprotected sex in high risk groups | -2.6445 | 0.0267*  |
| HIV testing                         | 2.2945  | 0.03774* |
| HIV prevalence                      | -0.9702 | 0.3604   |
| Equipment sharing                   | 0.1692  | 0.8681   |
| General condom use                  | 1.2654  | 0.2152   |
| Consistent condom use               | 1.3045  | 0.2085   |
| Condom use with regular partners    | 0.6354  | 0.5341   |
| Condom use with casual partners     | 1.0015  | 0.3349   |

\* $P < 0.05$

**Supplemental table 3 Results of meta regression.**

|              | HIV testing |         | Equipment sharing |          | Condom use |        |
|--------------|-------------|---------|-------------------|----------|------------|--------|
|              | estimate    | P       | Estimate          | P        | Estimate   | P      |
| Time         | 0.0416      | 0.0345* | -0.3665           | 0.938*** | 0.0461     | 0.574  |
| East Asia    | 0.3235      | 0.6206  | -0.0469           | 0.9334   | Null       | Null   |
| Europe       | -0.5752     | 0.5576  | 0.3039            | 0.5964   | Null       | Null   |
| Africa       | Null        | Null    | Null              | Null     | 0.2639     | 0.4379 |
| Central Asia | Null        | Null    | Null              | Null     | 0.1890     | 0.5675 |
| IDUs         | -0.258      | 0.7761  | Null              | Null     | 0.198      | 0.7643 |
| MSM          | 0.644       | 0.2861  | Null              | Null     | -0.0068    | 0.9896 |
| FSWs         | Null        | Null    | Null              | Null     | 0.4108     | 0.4048 |

Significant codes: 0 '\*\*\*' 0.001 '\*\*' 0.01 '\*' 0.05 '.' 0.1 ' ' 1
