# Supplementary material for: Peer education for HIV prevention among high-risk groups: a systematic review and meta-analysis
Source: Springer Nature journal article supplement (doi:10.1186/s12879-020-05003-9), 2020-05-12
Supplement: MOESM3 [file 17975932]

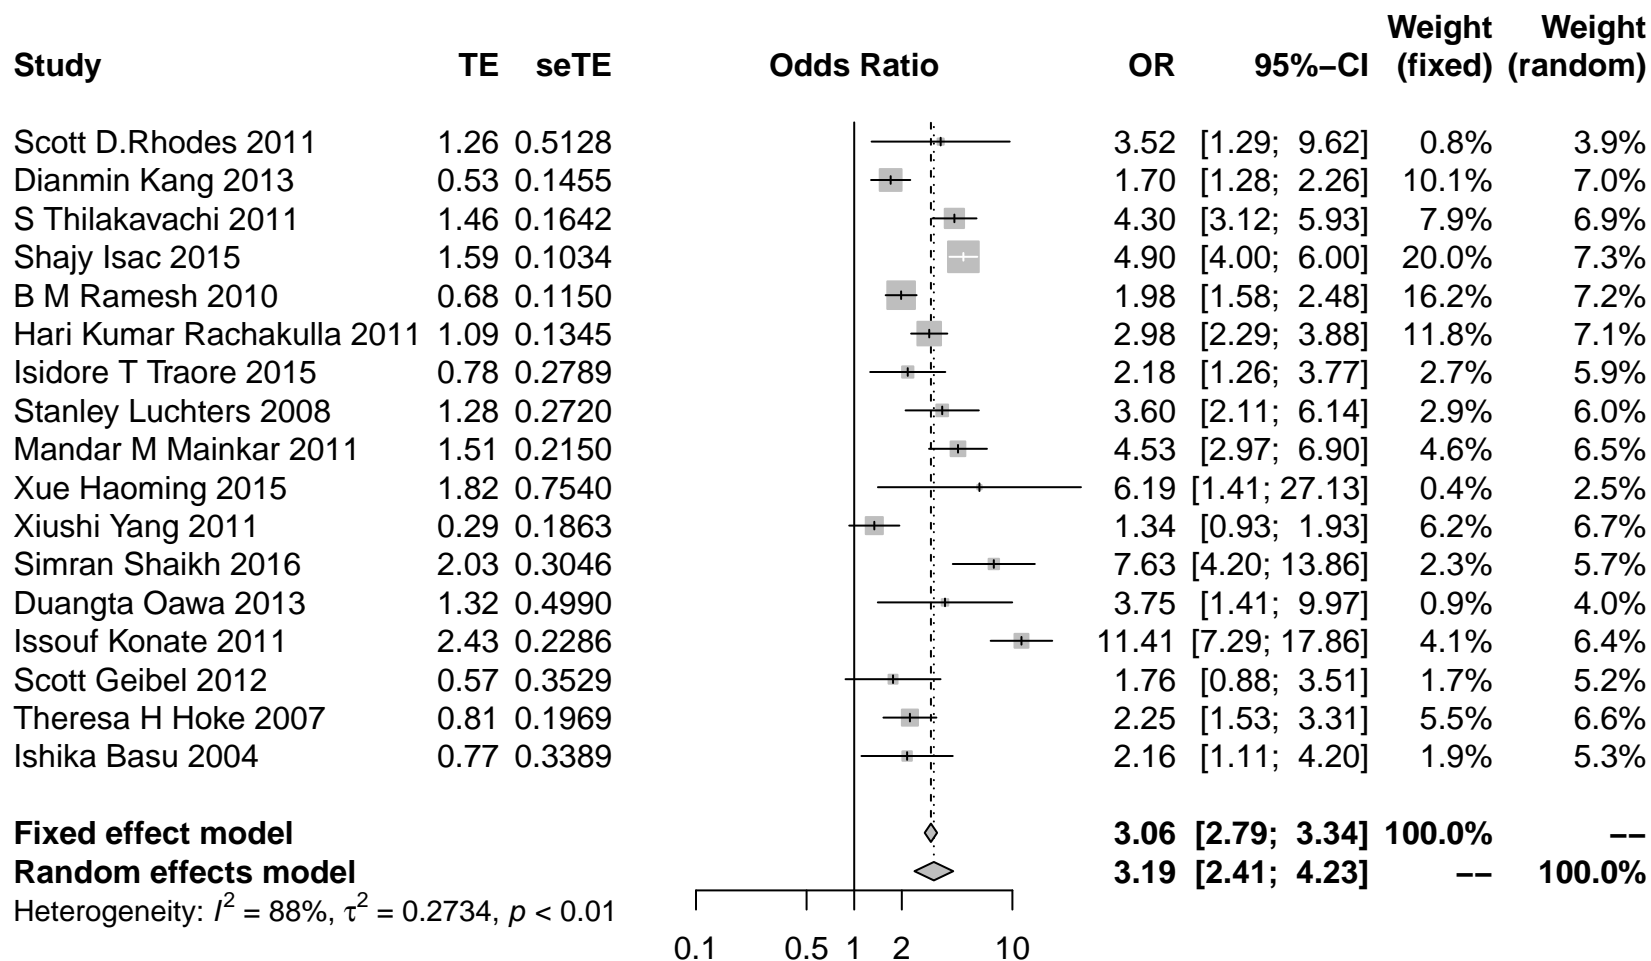

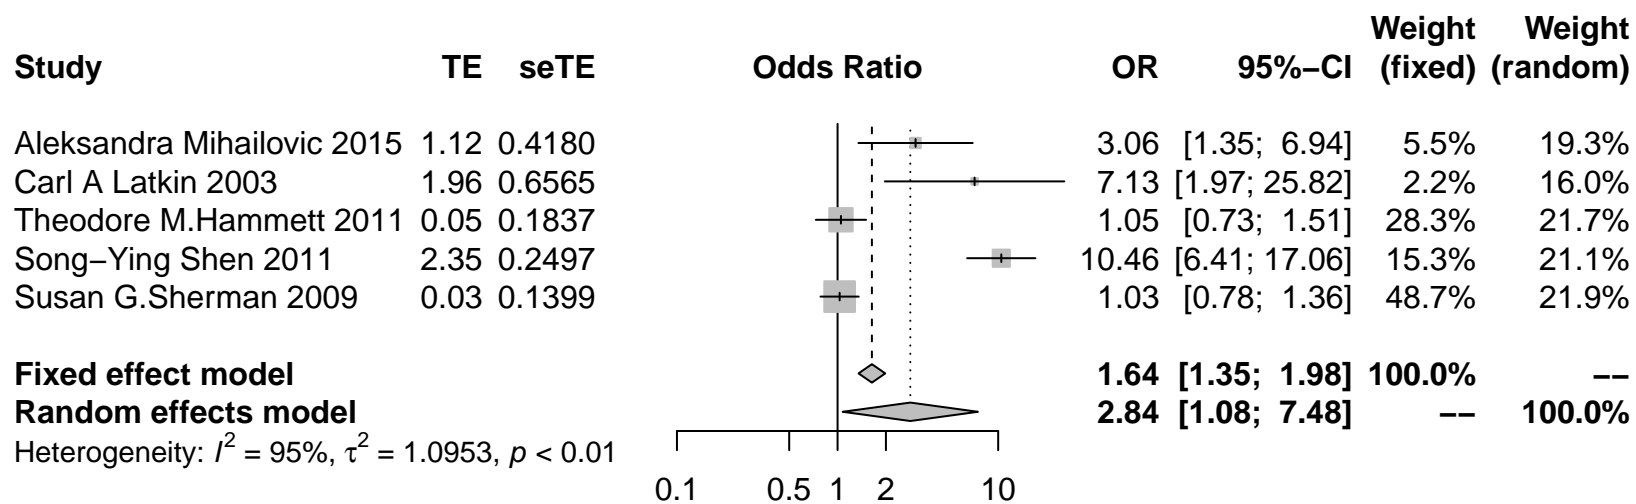

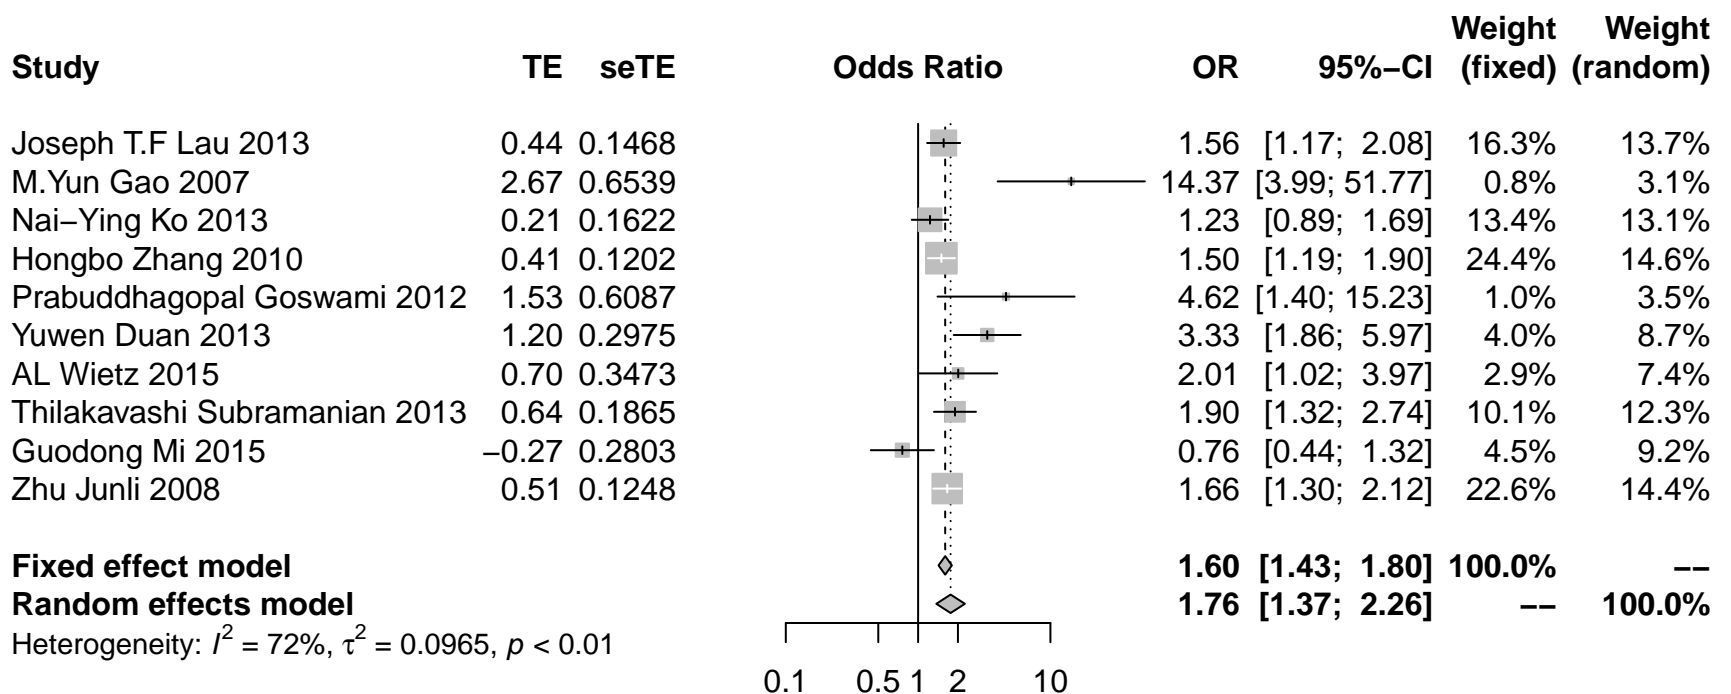

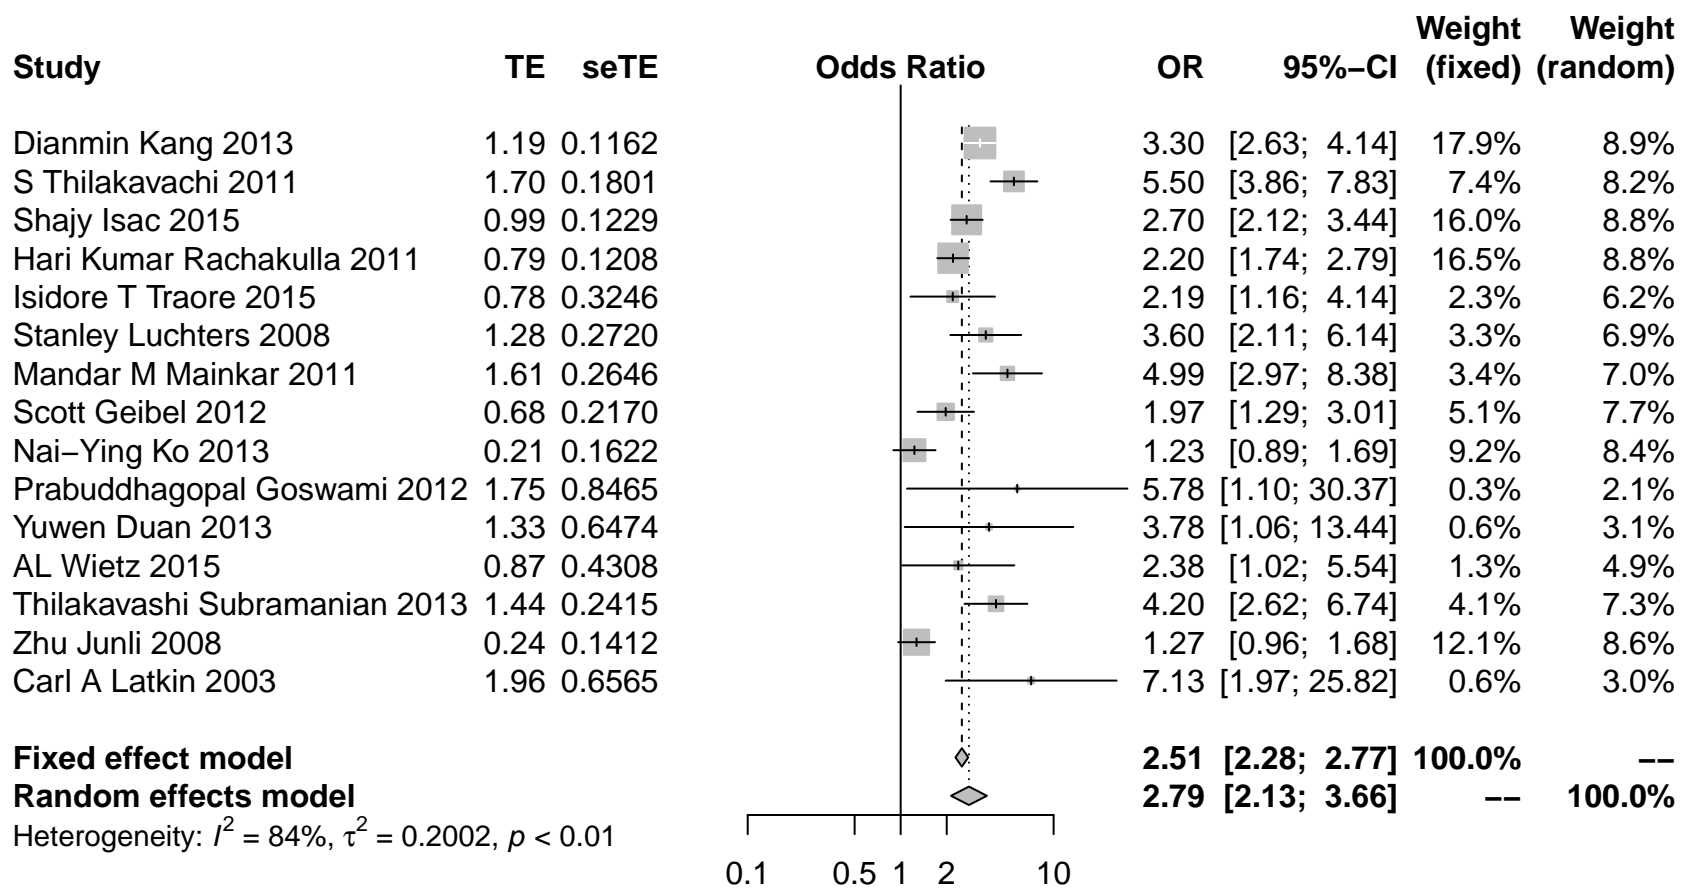

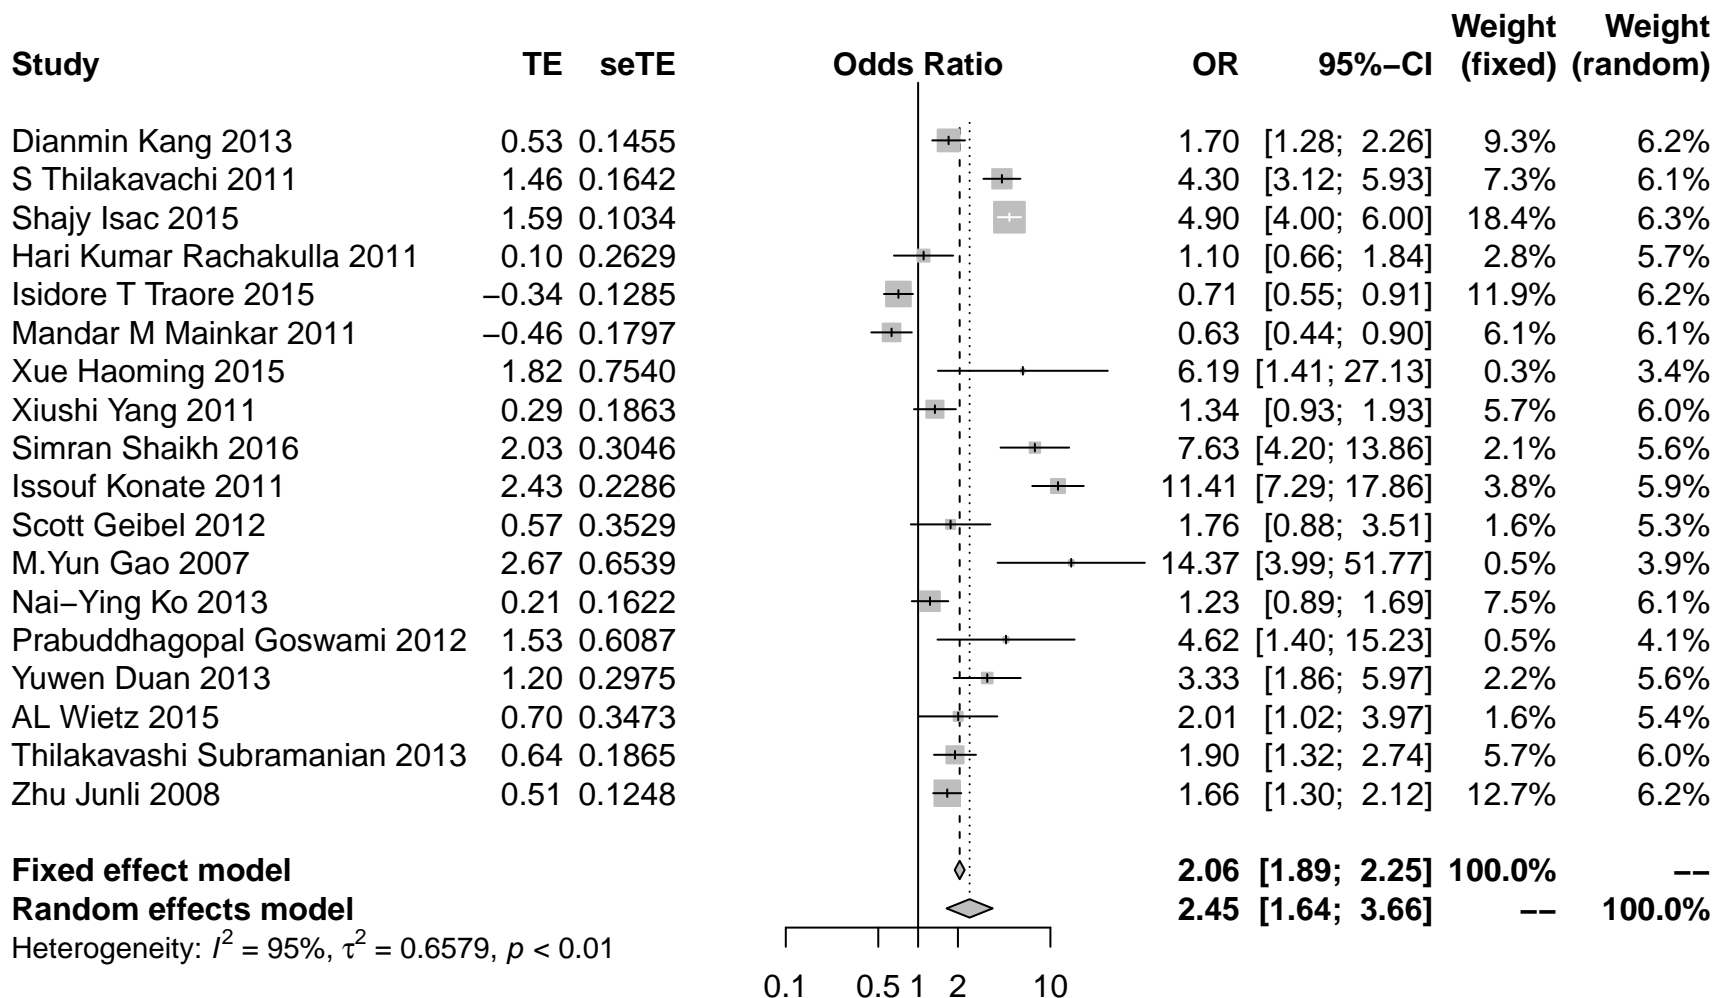

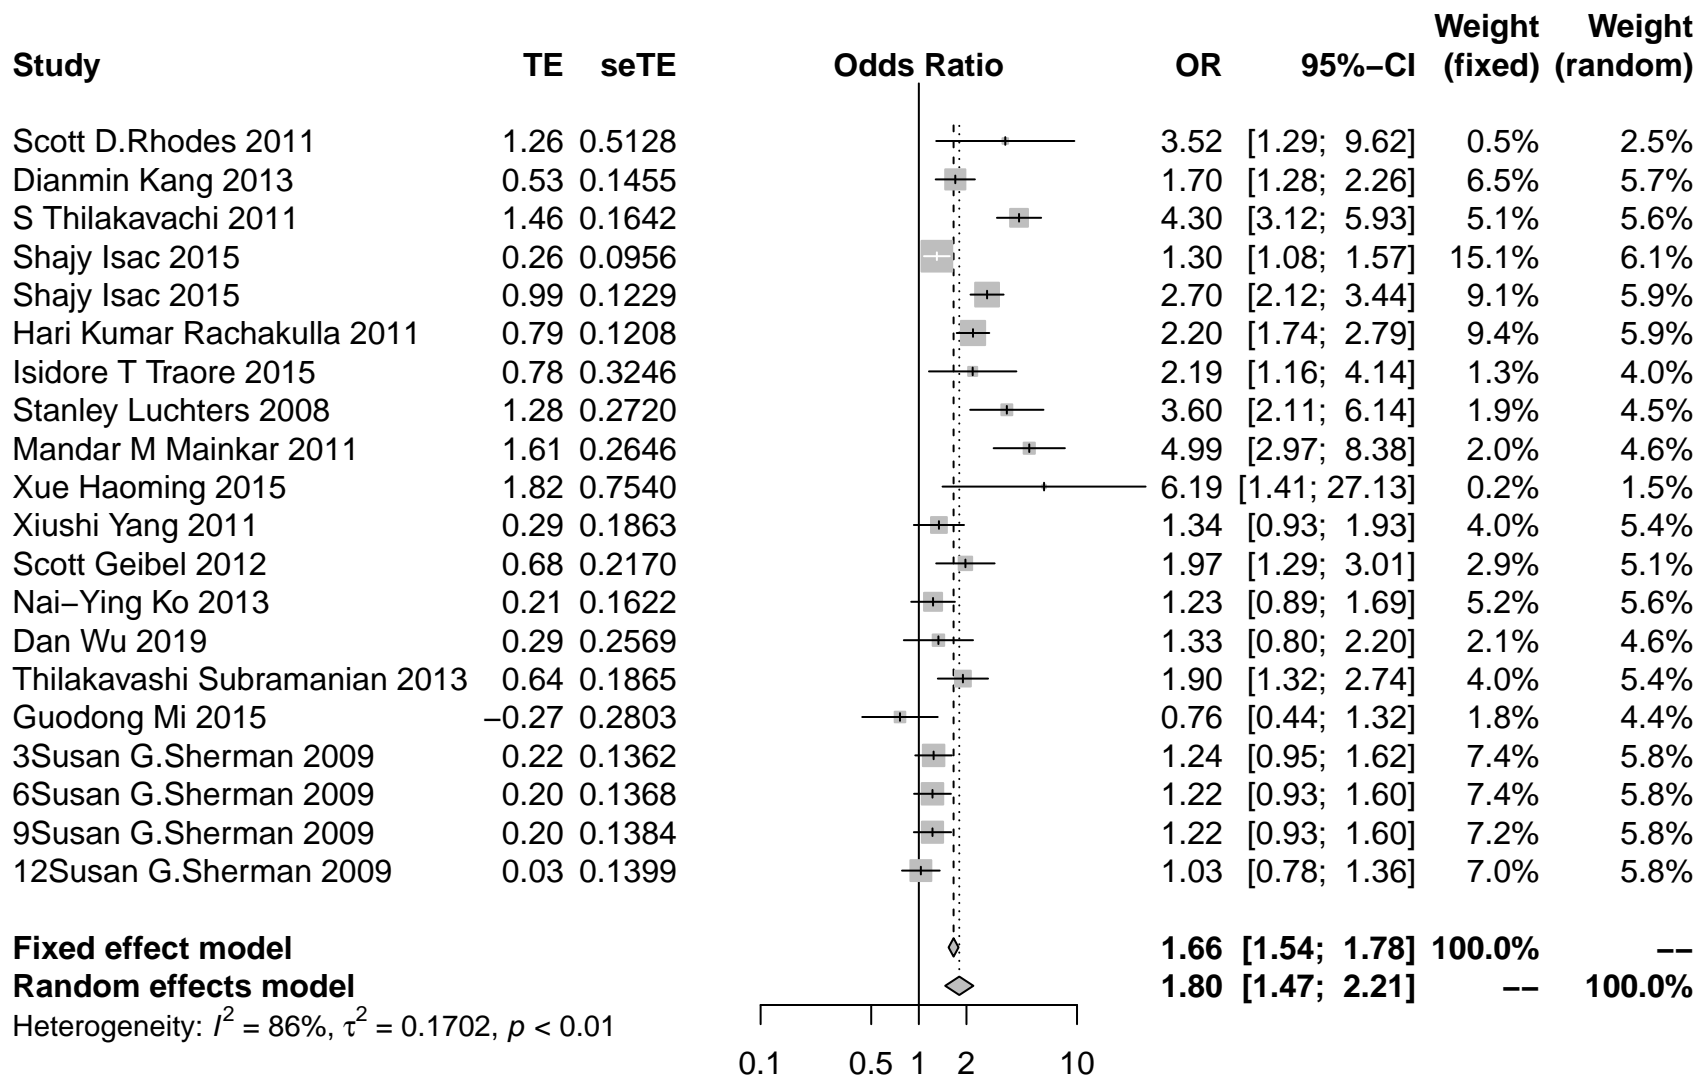

The captions

Supplemental figure 9 the forest plot of the condom use among FSWs

Supplemental figure 10 the forest plot of the condom use among IDUs

Supplemental figure 11 the forest plot of the condom use among MSM

Supplemental figure 12 the forest plot of condom use with casual partners

Supplemental figure 13 the forest plot of condom use with regular partners

Supplemental figure 14 the forest plot of consistent condom use
